# Supplementary material for: Functional Inhibition of Host Histone Deacetylases (HDACs) Enhances in vitro and in vivo Anti-mycobacterial Activity in Human Macrophages and in Zebrafish
Source: PubMed Central journal article supplement (PMC7008710; doi:10.3389/fimmu.2020.00036), 2020-02-03
Supplement: Image_2.pdf [file Image_2.pdf]

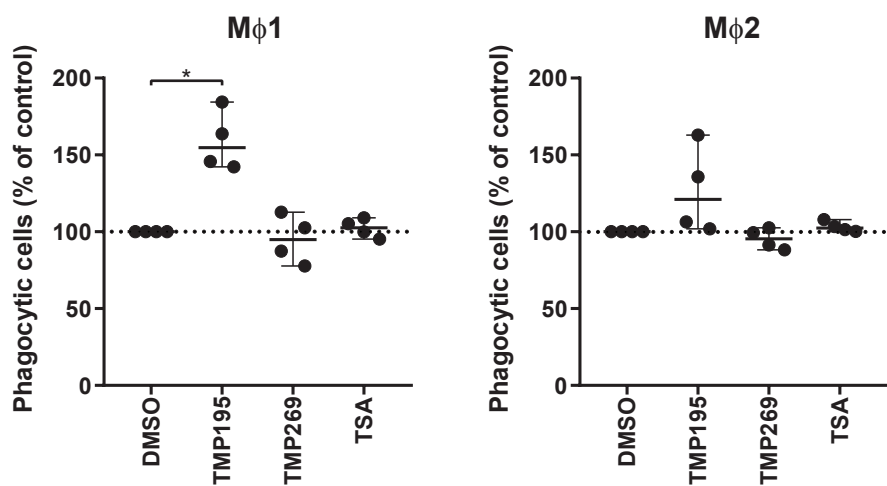

**Figure S2. A higher percentage of macrophages exhibit phagocytic capabilities when exposed during differentiation to low concentrations of HDAC inhibitor TMP195.** The percentage of Mφ1 and Mφ2 with phagocytic capabilities (containing 1+ beads) was evaluated by flow-cytometry using fluorescent beads (experimental setup as in Fig 3D). Dots represent the mean of 3 replicates of a single donor expressed as a percentage of the DMSO control. Horizontal lines indicate median percentage phagocytic cells of all 4 donors and whiskers represent 95% confidence intervals. Statistically significant differences compared to DMSO were tested using a RM one-way ANOVA with Dunnett's multiple test correction. (\* =  $p < 0.05$ ).
