# Supplementary material for: Functional Inhibition of Host Histone Deacetylases (HDACs) Enhances in vitro and in vivo Anti-mycobacterial Activity in Human Macrophages and in Zebrafish
Source: PubMed Central journal article supplement (PMC7008710; doi:10.3389/fimmu.2020.00036), 2020-02-03
Supplement: Image_4.pdf [file Image_4.pdf]

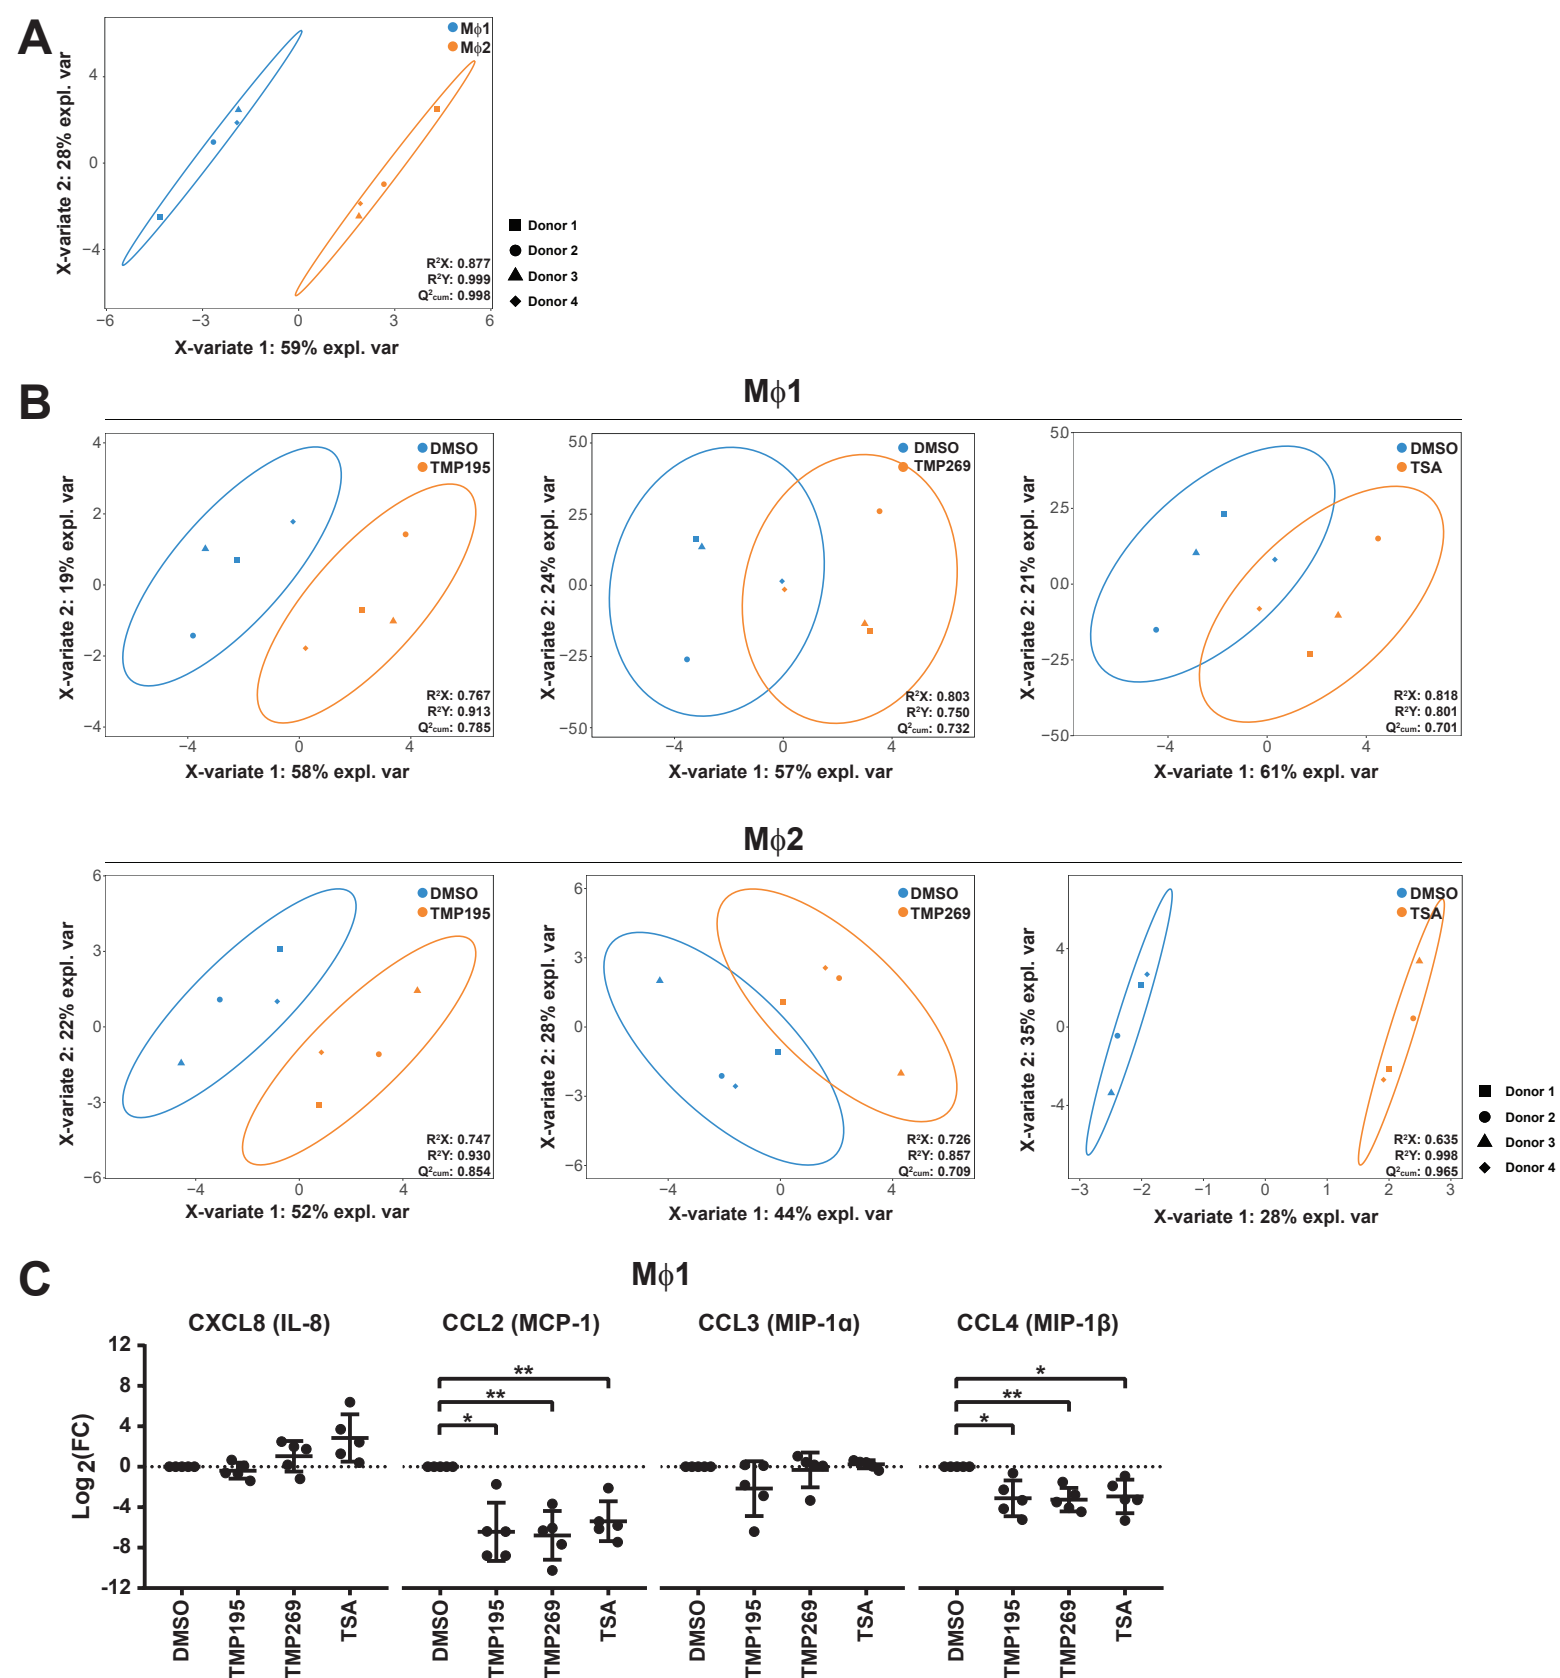

**Figure S4. Inhibition of HDAC activity during monocyte differentiation modifies the cytokine/chemokine response of Mφ1 and Mφ2 upon *Mtb* infection.** **A.** A multilevel PLS-DA model of cytokine profiles derived from standardly differentiated Mφ1 and Mφ2 24h following *Mtb* infection was generated using R package mixOmics. Model validity is indicated by the R<sup>2</sup>X, R<sup>2</sup>Y and Q<sup>2</sup>cum scores. **B.** Multilevel PLS-DA models of cytokine profiles derived from *Mtb*-infected Mφ1 and Mφ2 exposed to TMP195 (300 nM), TMP269 (300 nM), TSA (30 nM) or DMSO at equal v/v during differentiation were generated using R package mixOmics. Model validity is indicated by the R<sup>2</sup>X, R<sup>2</sup>Y and Q<sup>2</sup>cum scores. **C.** Transcript levels of CCL3 (MIP-1α), CCL4 (MIP-1β), CXCL8 (IL-8) and CCL2 (MCP-1) were determined in duplicate using qRT-PCR analysis in primary human *Mtb*-infected Mφ1 derived from 5 different donors. Experimental setup as in B. Data was normalized to GAPDH ( $\Delta\Delta C_t$ ) and mean expression levels of duplicate samples were calculated for each donor. Dot plots display log<sub>2</sub> FC expression levels to their respective baseline controls (standardly differentiated Mφ1), calculated using the formula  $2^{-\Delta\Delta C_t}$ . Each dot represents a single donor while horizontal lines indicate median log<sub>2</sub> FC values of all 5 donors and whiskers represent 95% confidence intervals. Significant differences between treatments were determined using a RM one-way ANOVA with Dunnett's multiple test correction. (\* =  $p < 0.05$  and \*\* =  $p < 0.01$ ).
