# Supplementary material for: Functional Inhibition of Host Histone Deacetylases (HDACs) Enhances in vitro and in vivo Anti-mycobacterial Activity in Human Macrophages and in Zebrafish
Source: Front Immunol. 2020 Feb 3;11:36. doi: 10.3389/fimmu.2020.00036 (PMC7008710; doi:10.3389/fimmu.2020.00036)
Supplement: Supplementary file 6 [file Table_1.XLSX]

## Sheet: Table S1
	Supplementary Table 1. Exposure to low concentrations HDAC inhibitors during monocyte differentiation alters the cytokine/chemokine response of Mɸ1 and Mɸ2 upon Mtb infection.
				Mɸ1			Mɸ2							Mɸ1					Mɸ2
				Mock	Mtb		Mock	Mtb						DMSO	TMP195	TMP269	TSA		DMSO	TMP195	TMP269	TSA
	Anti-inflammatory	IL-10		4.54833	123.992		27.68	758.883			Anti-inflammatory	IL-10		32.115	10.18	10.18	10.18		755.505	806.105	781.935	348.335
		IL-1ra		1890.32	4078.59		155.09	406.322				IL-1ra		2254.95	1861.24	1303.15	3547.16		592.65	527.435	651.22	666
	Pro-inflammatory	TNF-a		59.44	4548.37		25.2317	778.223			Pro-inflammatory	TNF-a		1086.21	384.3	456.745	639.105		440.17	911.18	593.375	898.685
		IL-6		20.1483	723.2		8.57333	243.088				IL-6		64.465	15.605	13.51	25.6		225.81	112.135	97.715	146.79
		GM-CSF		5.17833	137.923		4.67667	24.815				GM-CSF		35.645	11.24	11.24	15.05		79.435	78.295	77.55	80.48
		IL-1b		2.94	46.205		2.94	9.20333				IL-1b		3.625	2.705	2.94	2.59		35.085	18.53	20.655	39.85
		G-CSF		33.6717	318.678		30.13	67.405				G-CSF		94.87	16.37	17.915	16.37		277.29	204.91	252.88	265.115
		IL-12p40		5.82	48.6917		5.82	11.0717				IL-12p40		16.7	12.08	12.08	8.36		8.36	8.36	12.08	8.36
		IL-17a		5.89167	11.7583		4.60333	14.485				IL-17a		30.98	23.01	16.585	19.895		64.37	57.1	58.975	43.055
		IFN-g		34.87	34.87		34.87	34.87				IFN-g		13.1	1.9	1.9	1.9		37.595	25.095	36.445	30.42
	Chemokines	MIP-1a		182.41	2248.54		37.26	1513.63			Chemokines	MIP-1a		1373.16	437.1	493.585	702.355		256.455	229.38	129.015	551.72
		MIP-1b		321.08	4706.54		119.408	2659.24				MIP-1b		999.66	644.505	501.75	684.36		548.22	633.225	491.24	681.91
		RANTES		21.0417	180.088		2.97	40.095				RANTES		54.54	35.01	34.77	34.77		34.77	34.77	34.77	34.77
		IP-10		34.8883	234.622		33.2567	587.125				IP-10		2.91	11.94	2.91	11.94		74	80.665	99.54	55.89
		GRO		501.293	3331.58		1666.35	8271.19				GRO		430.365	104.445	276.65	179.045		3464.34	2558.57	4050.68	1809.11
		MCP-3		155.58	544.945		30.6817	197.312				MCP-3		76.035	27.815	44.31	78.36		33.175	28.86	38.055	59.485
		IL-8		1102.04	8769.88		3315.61	9649.15				IL-8		4099.52	1225.84	1372.19	2199.93		8265.08	8265.08	8265.08	8265.08
		MCP-1		4428.03	6938.04		1079.05	8691.52				MCP-1		2484.03	1330.62	1498.66	2751.26		2499.99	2058.3	2226.8	4045.39
		MDC		9999.91	9999.91		122.58	87.5017				MDC		5806.2	6412.64	3664.24	4777.25		132.995	228.825	176.995	79.555
		EGF		32.65	32.65		32.65	32.65				EGF		4.27	4.735	4.54	4.225		28.175	15.93	21.685	20.765
		Eotaxin		7.72333	4.28833		5.61167	11.4567				Eotaxin		16.04	9.445	15.635	17.38		40.9	24.325	44.22	40.58
	Shown are median cytokine/chemokine expression levels (of 4 different donors) in supernatants of standardly differentiated Mɸ1 and Mɸ2 24h following Mtb or mock infection (left panel) or in supernatants of Mɸ1 and Mɸ2 exposed to TMP195 (300 nM), TMP269 (300 nM), TSA (30 nM) or DMSO at equal v/v during differentiation (right panel). Of the 41 analytes measured, only cytokines/chemokines that chang…
